# Supplementary material for: Functional Groups Dominate Aboveground Net Primary Production under Long-Term Nutrient Additions in a Tibetan Alpine Meadow
Source: MDPI journal article supplement (doi:10.3390/plants13030344), 2024-01-23
Supplement: s1 [file s1]

## Supplementary Information

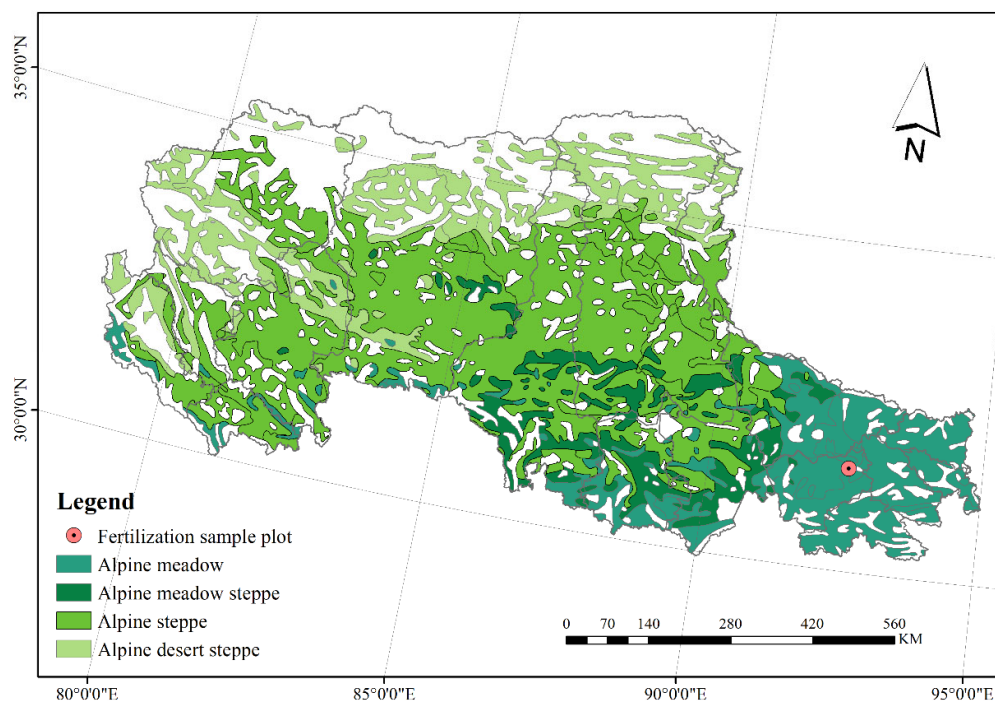

**Figure S1.** The location of study area

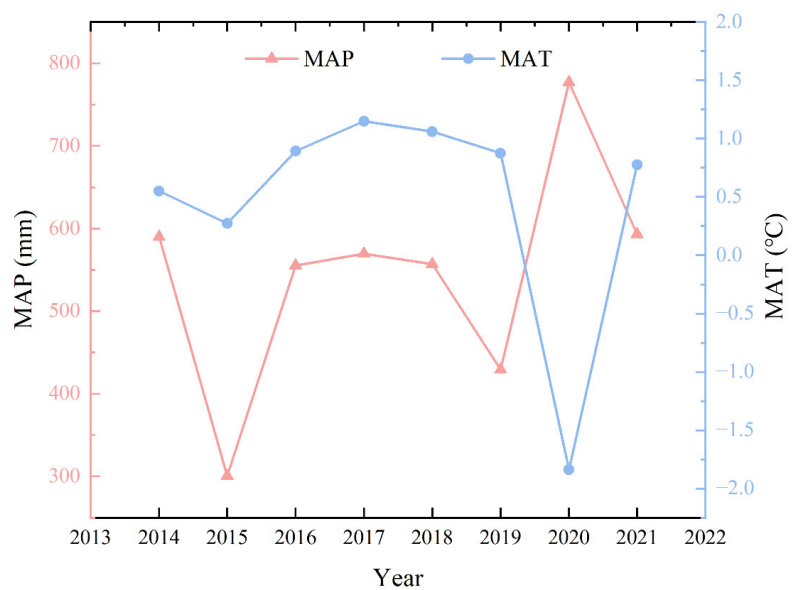

**Figure S2.** MAP and MAT in the study area from 2014 to 2021

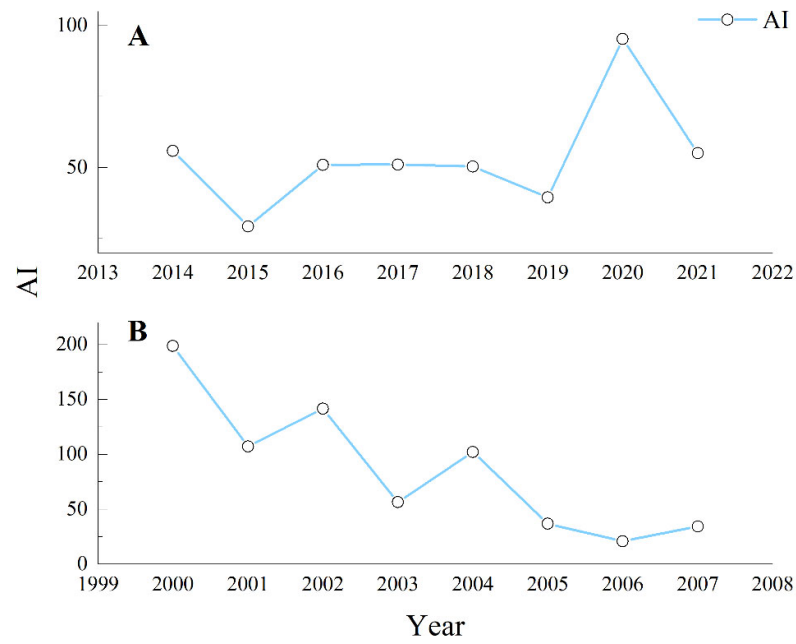

**Figure S3.** The changes of the aridity index (AI) from 2014 to 2021 (A), 2000 to 2007 (B).

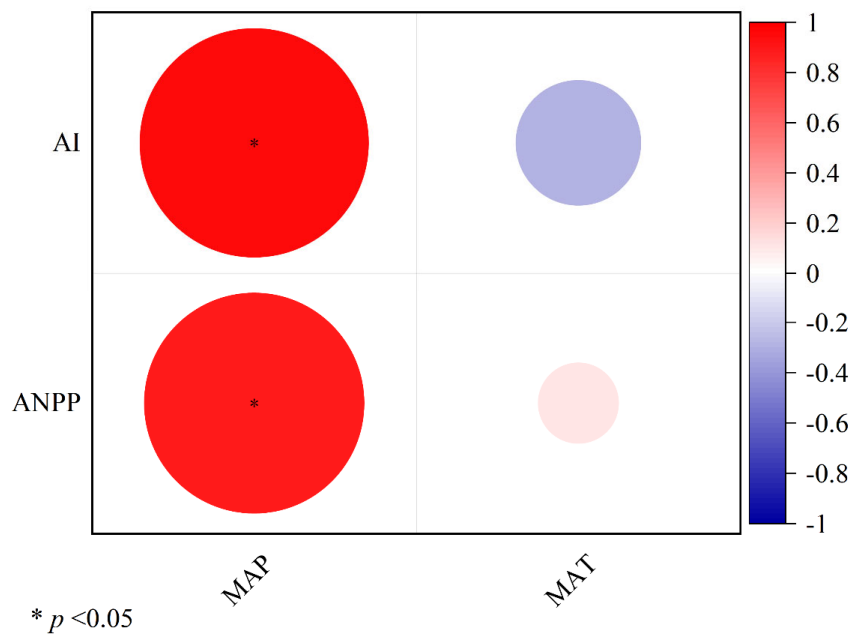

**Figure S4.** Correlation analysis between MAP, MAT, AI and ANPP.

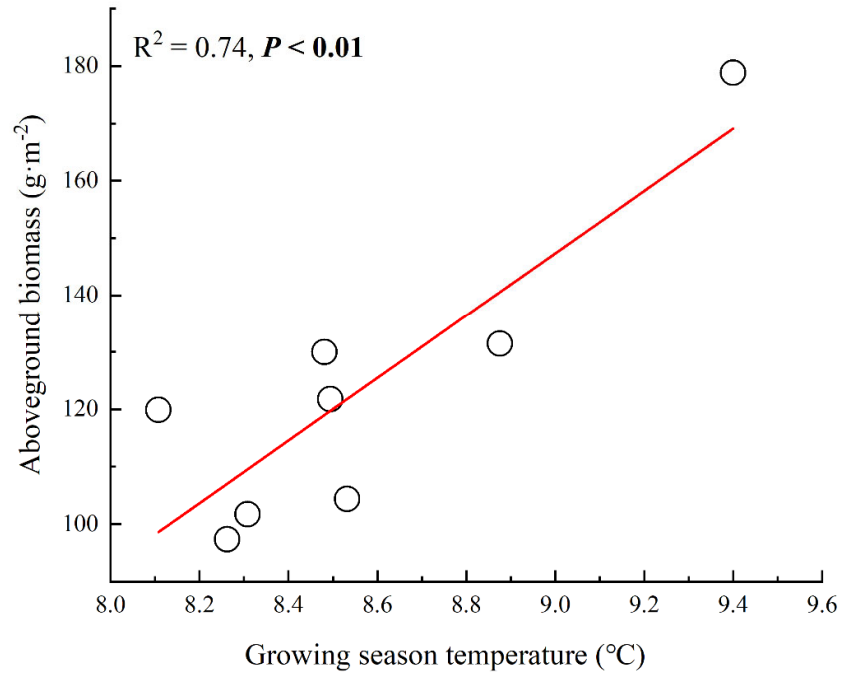

**Figure S5.** Fitting analysis of growing season temperature and aboveground biomass.

**Table S1.** Variations of soil properties in four treatments.

| Treatment | pH         | NH <sub>4</sub> <sup>+</sup> -N<br>(mg·kg <sup>-1</sup> ) | NO <sub>3</sub> <sup>-</sup> -N<br>(mg·kg <sup>-1</sup> ) | TP<br>(g·kg <sup>-1</sup> ) | TN<br>(g·kg <sup>-1</sup> ) | AP<br>(g·kg <sup>-1</sup> ) |
|-----------|------------|-----------------------------------------------------------|-----------------------------------------------------------|-----------------------------|-----------------------------|-----------------------------|
| CK        | 6.7±0.5 a  | 10.42±4.6 a                                               | 15.99±1.4 b                                               | 0.32±0.01 b                 | 3.56±0.4 a                  | 8.53±2.9 b                  |
| N         | 6.2±0.5 b  | 10.43±2.7 a                                               | 25.85±3.8 a                                               | 0.37±0.05 b                 | 3.91±0.4 a                  | 10.09±2.0 b                 |
| P         | 6.5±0.2 ab | 12.23±1.3 a                                               | 13.45±3.0 b                                               | 0.54±0.04 a                 | 3.90±0.6 a                  | 76.8±16.7 a                 |
| N+P       | 6.1±0.2 ab | 12.38±5.9 a                                               | 24.34±5.6 a                                               | 0.55±0.02 a                 | 3.74±0.4 a                  | 83.80±6.5 a                 |

TN, soil total N; TP, soil total P; AP, available P. Different letters indicate significant differences (Duncan's test,  $p < 0.05$ ) among four treatments.
